# Supplementary material
Source: PubMed Central journal article supplement (PMC7405878)
Supplement: mmc1.pdf [file mmc1.pdf]

## Supplemental Information

### Elevated Calprotectin and Abnormal Myeloid Cell

### Subsets Discriminate Severe from Mild COVID-19

Aymeric Silvin, Nicolas Chapuis, Garrett Dunsmore, Anne-Gaëlle Goubet, Agathe Dubuisson, Lisa Derosa, Carole Almiré, Clémence Hénon, Olivier Kosmider, Nathalie Droin, Philippe Rameau, Cyril Catelain, Alexia Alfaro, Charles Dussiau, Chloé Friedrich, Elise Sourdeau, Nathalie Marin, Tali-Anne Szwebel, Delphine Cantin, Luc Mouthon, Didier Borderie, Marc Deloger, Delphine Bredel, Severine Mouraud, Damien Drubay, Muriel Andrieu, Anne-Sophie Lhonneur, Véronique Saada, Annabelle Stoclin, Christophe Willekens, Fanny Pommeret, Frank Griscelli, Lai Guan Ng, Zheng Zhang, Pierre Bost, Ido Amit, Fabrice Barlesi, Aurélien Marabelle, Frédéric Pène, Bertrand Gachot, Fabrice André, Laurence Zitvogel, Florent Ginhoux, Michaela Fontenay, and Eric Solary

## Supplemental Tables

**Table S1 related to all Figures:** Main characteristics of the patients enrolled in the study. A total number of 158 patients were included. Samples collected from a given patients have been used in several experiments.

|                                                       | All patients    | SARS-CoV-2 negative Controls | SARS-CoV-2 positive Mild | SARS-CoV-2 positive Moderate | SARS-CoV-2 positive Severe |
|-------------------------------------------------------|-----------------|------------------------------|--------------------------|------------------------------|----------------------------|
| Number (%)                                            | 158             | 72 (46)                      | 27 (17)                  | 16 (10)                      | 43 (27)                    |
| Age, median (IQR)                                     | 53 (37-63)      | 50 (31-58)                   | 42 (29-56)               | 64 (53-72)                   | 62 (50-69)                 |
| Age > 60 year-old, n (%)                              | 48 (30)         | 12 (17)                      | 3 (11)                   | 11 (69)                      | 22 (51)                    |
| Male, n (%)                                           | 69 (44)         | 27 (38)                      | 8 (30)                   | 5 (31)                       | 29 (67)                    |
| <b>Comorbidities, n (%)</b>                           |                 |                              |                          |                              |                            |
| Overweight                                            | 78 (49)         | 33 (46)                      | 9 (33)                   | 5 (31)                       | 31 (72)                    |
| Cardiovascular                                        | 55 (35)         | 20 (28)                      | 5 (19)                   | 10 (62)                      | 20 (47)                    |
| Diabetes                                              | 29 (18)         | 9 (13)                       | 1 (4)                    | 6 (38)                       | 13 (30)                    |
| Respiratory                                           | 31 (20)         | 17 (24)                      | 1 (4)                    | 3 (19)                       | 10 (23)                    |
| Cancer                                                | 34 (22)         | 13 (18)                      | 5 (19)                   | 7 (44)                       | 9 (21)                     |
| <b>Initial symptoms, n (%)</b>                        |                 |                              |                          |                              |                            |
| Fever                                                 | 56 (35)         | 10 (14)                      | 4 (15)                   | 11 (69)                      | 31 (72)                    |
| Cough                                                 | 86 (54)         | 31 (43)                      | 16 (59)                  | 10 (62)                      | 29 (67)                    |
| Dyspnea                                               | 46 (29)         | 3 (4)                        | 2 (7)                    | 7 (44)                       | 34 (79)                    |
| Myalgia                                               | 49 (31)         | 27 (38)                      | 11 (41)                  | 1 (6)                        | 10 (23)                    |
| Diarrhea                                              | 35 (22)         | 14 (19)                      | 6 (22)                   | 5 (31)                       | 10 (23)                    |
| Anosmia/Ageusia                                       | 30 (19)         | 11 (15)                      | 10 (37)                  | 2 (13)                       | 7 (16)                     |
| <b>Laboratory findings, median (IQR)</b>              |                 |                              |                          |                              |                            |
| Leukocytes (G/L)                                      | 7.1 (5.6-10.3)  | 6.7 (5.6-8.5)                | 5.6 (4.3-6.8)            | 5.7 (4.7-8.9)                | 10.4 (7.9-14.6)            |
| Neutrophils (G/L)                                     | 4.4 (3.0-7.4)   | 3.7 (2.9-5.2)                | 2.8 (2.3-3.5)            | 4.6 (3.4-6.1)                | 7.8 (6.4-11.2)             |
| Lymphocytes (G/L)                                     | 1.6 (1.0-2.1)   | 1.9 (1.5-2.3)                | 1.6 (1.0-2.1)            | 1.0 (0.7-1.3)                | 1.1 (0.7-1.7)              |
| Monocytes (G/L)                                       | 0.5 (0.4-0.8)   | 0.5 (0.4-0.6)                | 0.5 (0.4-0.7)            | 0.4 (0.2-0.7)                | 0.8 (0.4-1.1)              |
| Hemoglobin (g/dL)                                     | 12.6 (9.9-13.9) | 13.7 (12.8-14.7)             | 13.0 (11.3-13.6)         | 10.5 (9.6-13.0)              | 9.8 (8.1-11.9)             |
| Platelets (G/L)                                       | 255 (205-320)   | 257 (227-303)                | 210 (171-296)            | 191 (123-323)                | 273 (210-407)              |
| Fibrinogen (g/L)                                      | 5.0 (3.1-6.7)   | 3.1 (2.5-4.0)                | 3.4 (3.0-4.5)            | 5.4 (5.0-6.3)                | 7.5 (5.5-8.0)              |
| D-dimers (ng/mL)                                      | 590 (241-2122)  | 245 (160-524)                | 309 (200-594)            | 1089 (666-1954)              | 2145 (1285-5331)           |
| IL-6 (ng/L)                                           | 1.7 (1.4-39.6)  | 1.4 (1.4-2.2)                | 1.4 (1.4-2.9)            | 36.0 (15.4-48.5)             | 89.3 (48.8-157.6)          |
| CRP (mg/L)                                            |                 |                              |                          | 50.5 (30.6-98.0)             | 142.8 (91.1-194.5)         |
| Ferritin (µg/L)                                       |                 |                              |                          | 858 (598-858)                | 959 (454-1828)             |
| LDH (U/L)                                             |                 |                              |                          | 240 (203-310)                | 400 (328-460)              |
| <b>Chest CT findings, n (%)</b>                       |                 |                              |                          |                              |                            |
| NA                                                    | 94 (59)         | 68 (94)                      | 22 (81)                  | 1 (6)                        | 3 (7)                      |
| <10%                                                  | 3 (4)           | 0 (0)                        | 2 (7)                    | 1 (6)                        | 0 (0)                      |
| 10-25%                                                | 12 (8)          | 2 (3)                        | 0 (0)                    | 6 (38)                       | 4 (2)                      |
| 25-50%                                                | 29 (18)         | 1 (1)                        | 3 (11)                   | 7 (44)                       | 18 (42)                    |
| >50%                                                  | 20 (13)         | 1 (0)                        | 0 (0)                    | 1 (6)                        | 18 (42)                    |
| <b>Anti-inflammatory drugs, n</b>                     |                 |                              |                          |                              |                            |
| Dexamethasone                                         | 6               | 0                            | 0                        | 2                            | 4                          |
| anti-IL-1 (anakinra)                                  | 3               | 0                            | 0                        | 1                            | 3                          |
| anti-IL-6 (sari, toci)                                | 9               | 0                            | 0                        | 2                            | 7                          |
| <b>Severity criteria</b>                              |                 |                              |                          |                              |                            |
| PE, n (%)                                             | 11 (7)          | 0 (0)                        | 0 (0)                    | 3 (19)                       | 8 (19)                     |
| Maximal O <sub>2</sub> (L/min), median (range)        |                 |                              |                          | 2 (0-8)                      | 15 (6-50), n=12            |
| Mechanical ventilation, n                             |                 |                              |                          |                              | 30                         |
| PaO <sub>2</sub> /FiO <sub>2</sub> , median (range)*  |                 |                              |                          |                              | 157 (75-453)               |
| SOFA, median (range)*                                 |                 |                              |                          |                              | 5.5 (2-12)                 |
| SOFA ≥ 8, n (%)*                                      |                 |                              |                          |                              | 10 (33)                    |
| Death, n (%)                                          |                 |                              | 1 (4)                    | 0 (0)                        | 9 (21)                     |
| <b>Sampling, n (%)</b>                                |                 |                              |                          |                              |                            |
| Delay since 1 <sup>st</sup> day in hospital ≤ 10 days | 150 (95)        | 71 (99)                      | 27 (100)                 | 16 (100)                     | 36 (84)                    |

IQR, interquartile range; CRP, C reactive protein; LDH, Lactate dehydrogenase; CT, computed tomography; NA, not available; sari, sarilumab; toci, tocilizumab; PE, pulmonary embolism; PaO<sub>2</sub>/FiO<sub>2</sub> (mmHg) at sampling; SOFA, Sequential Organ Failure Assessment score; \*Parameters calculated for patients under mechanical ventilation; “Delay since the 1<sup>st</sup> day in hospital ≤ 10 days” indicates the number of patients included in the study within the first 10 days after admission to the hospital.

**Table S2 related to Figure 1; Figure S1:** Characteristics of patients of the learning cohort analyzed by spectral cytometry (results shown on Figure 1 and supplemental Figure 1).

|                                                       | All patients     | SARS-CoV-2 negative Controls | SARS-CoV-2 positive Mild / Moderate | SARS-CoV-2 positive Severe |
|-------------------------------------------------------|------------------|------------------------------|-------------------------------------|----------------------------|
| Number (%)                                            | 25               | 12 (48)                      | 5 (20)                              | 8 (32)                     |
| Age, median (IQR)                                     | 54 (31-73)       | 48 (30-63)                   | 35 (28-56)                          | 73 (45-74)                 |
| Age > 60, n (%)                                       | 8 (32)           | 3 (25)                       | 0 (0)                               | 5 (38)                     |
| Male, n (%)                                           | 13 (52)          | 7 (58)                       | 0 (0)                               | 6 (25)                     |
| <b>Comorbidities, n (%)</b>                           |                  |                              |                                     |                            |
| Overweight                                            | 12 (48)          | 3 (25)                       | 1 (20)                              | 8 (100)                    |
| Cardiovascular                                        | 7 (28)           | 3 (25)                       | 0 (0)                               | 4 (50)                     |
| Diabetes                                              | 5 (20)           | 1 (8)                        | 0 (0)                               | 4 (50)                     |
| Respiratory                                           | 6 (24)           | 3 (25)                       | 1 (20)                              | 2 (25)                     |
| Cancer                                                | 1 (4)            | 0 (0)                        | 0 (0)                               | 1 (13)                     |
| <b>Initial symptoms, n (%)</b>                        |                  |                              |                                     |                            |
| Fever                                                 | 9 (36)           | 1 (8)                        | 0 (0)                               | 8 (100)                    |
| Cough                                                 | 13 (52)          | 5 (42)                       | 3 (60)                              | 5 (63)                     |
| Dyspnea                                               | 6 (24)           | 0 (0)                        | 0 (0)                               | 6 (75)                     |
| Myalgia                                               | 13 (52)          | 6 (50)                       | 3 (60)                              | 4 (50)                     |
| Diarrhea                                              | 4 (16)           | 0 (0)                        | 4 (80)                              | 0 (0)                      |
| Anosmia / Ageusia                                     | 3 (12)           | 0 (0)                        | 2 (40)                              | 1 (13)                     |
| <b>Laboratory findings, median (IQR)</b>              |                  |                              |                                     |                            |
| Leukocytes (G/L)                                      | 6.4 (5.0-10.0)   | 5.8 (4.8-6.6)                | 6.0 (4.4-7.1)                       | 13.3 (9.6-18.1)            |
| Neutrophils (G/L)                                     | 3.7 (2.9-6.8)    | 3.3 (2.8-3.5)                | 2.9 (2.8-4.0)                       | 10.9 (7.2-14.0)            |
| Lymphocytes (G/L)                                     | 1.8 (1.6-2.3)    | 1.8 (1.6-2.5)                | 2.3 (1.7-2.3)                       | 1.8 (0.9-2.0)              |
| Monocytes (G/L)                                       | 0.5 (0.4-0.6)    | 0.4 (0.3-0.5)                | 0.6 (0.5-0.7)                       | 0.6 (0.5-1.3)              |
| Hemoglobin (g/dL)                                     | 12.9 (11.7-14.4) | 14.5 (13.0-15.5)             | 13.1 (12.8-13.1)                    | 11.1 (8.9-12.0)            |
| Platelet count (G/L)                                  | 248 (204-304)    | 235 (202-261)                | 206 (204-246)                       | 393 (268-522)              |
| Fibrinogen (g/L)                                      | 3.0 (2.6-6.3)    | 2.5 (2.3-2.9)                | 2.8 (2.8-3.4)                       | 7.8 (6.3-8.8)              |
| D-dimers (ng/mL)                                      | 339 (184-568)    | 184 (85-204)                 | 339 (249-568)                       | 3738 (836-6489)            |
| IL-6 (ng/L)                                           | 1.4 (1.4-54.0)   | 1.4 (1.4-1.4)                | 1.4 (1.4-2.3)                       | 189.0 (59.2-677.0)         |
| CRP (mg/L)                                            |                  |                              |                                     | 116.0 (102.5-241.7)        |
| Ferritin (µg/L)                                       |                  |                              |                                     | 1133 (972-1633)            |
| LDH (U/L)                                             |                  |                              |                                     | 418 (352-446)              |
| <b>Chest CT findings, n (%)</b>                       |                  |                              |                                     |                            |
| NA                                                    | 17 (68)          | 11 (92)                      | 5 (100)                             | 1 (13)                     |
| <10%                                                  | 0 (0)            | 0 (0)                        | 0 (0)                               | 0 (0)                      |
| 10-25%                                                | 3 (12)           | 1 (8)                        | 0 (0)                               | 2 (25)                     |
| 25-50%                                                | 3 (12)           | 0 (0)                        | 0 (0)                               | 3 (38)                     |
| >50%                                                  | 2 (8)            | 0 (0)                        | 0 (0)                               | 2 (25)                     |
| <b>Anti-inflammatory drugs, n</b>                     |                  |                              |                                     |                            |
| Dexamethasone                                         | 0                | 0                            | 0                                   | 0                          |
| anti-IL-1 (anakinra)                                  | 2                | 0                            | 1                                   | 1                          |
| anti-IL-6 (sari, toci)                                | 2                | 0                            | 1                                   | 1                          |
| <b>Severity criteria</b>                              |                  |                              |                                     |                            |
| PE, n (%)                                             | 3 (12)           | 0 (0)                        | 0 (0)                               | 3 (38)                     |
| Mechanical ventilation, n (%)                         |                  |                              |                                     | 8 (100)                    |
| PaO <sub>2</sub> /FiO <sub>2</sub> , median (range)*  |                  |                              |                                     | 138 (95-177)               |
| SOFA, median (range)*                                 |                  |                              |                                     | 8 (3-14)                   |
| SOFA ≥ 8, n (%)*                                      |                  |                              |                                     | 4 (50)                     |
| Death, n (%)                                          |                  |                              | 0 (0)                               | 4 (50)                     |
| <b>Sampling, n (%)</b>                                |                  |                              |                                     |                            |
| Delay since 1 <sup>st</sup> day in hospital ≤ 10 days | 24 (96)          | 12 (100)                     | 5 (100)                             | 7 (88)                     |

IQR, interquartile range; CRP, C reactive protein; LDH, Lactate deshydrogenase; NA, not available; CT, computed tomography; Sari, sarilumab; toci, tocilizumab; PE, pulmonary embolism; PaO<sub>2</sub>/FiO<sub>2</sub> (mmHg) at sampling; SOFA, Sequential Organ Failure Assessment score; \*Parameters calculated for patients under mechanical ventilation; "Delay since the 1<sup>st</sup> day in hospital ≤ 10 days" indicates the number of patients included in the study within the first 10 days after admission to the hospital.

**Table S3 related to Figures 2-4; Figures S2-S4:** Characteristics of patients analyzed by single cell RNA sequencing (results shown on Figure 2, 3 and 4 and supplemental Figure 2, 3 and 4). M, male; F, female; PE, pulmonary embolism; MV, mechanical ventilation; SOFA, Sequential Organ Failure Assessment score.

|                                           | SARS-CoV2 pos<br>Severe # 1 | SARS-CoV2 pos<br>Severe # 2 | SARS-CoV2 pos<br>Mild | Control<br># 1       | Control<br># 2      | Control<br># 3       |          |          |          |
|-------------------------------------------|-----------------------------|-----------------------------|-----------------------|----------------------|---------------------|----------------------|----------|----------|----------|
| Age                                       | 69                          | 26                          | 21                    | 54                   | 27                  | 58                   |          |          |          |
| Sex                                       | M                           | F                           | F                     | F                    | F                   | F                    |          |          |          |
| SARS-CoV2 RT-PCR                          | positive                    | positive                    | positive              | negative             | negative            | negative             |          |          |          |
| <b>Comorbidities</b>                      |                             |                             |                       |                      |                     |                      |          |          |          |
| Overweight                                | Yes                         | Yes                         | No                    | Yes                  | No                  | Yes                  |          |          |          |
| Cardiovascular                            | No                          | No                          | No                    | Yes                  | No                  | No                   |          |          |          |
| Diabetes                                  | Yes                         | Yes                         | No                    | No                   | No                  | Yes                  |          |          |          |
| Respiratory                               | No                          | No                          | No                    | No                   | No                  | No                   |          |          |          |
| Cancer                                    | No                          | No                          | No                    | No                   | No                  | No                   |          |          |          |
| <b>Initial symptoms</b>                   |                             |                             |                       |                      |                     |                      |          |          |          |
| Fever                                     | Yes                         | No                          | No                    | No                   | No                  | No                   |          |          |          |
| Cough                                     | Yes                         | No                          | Yes                   | Yes                  | Yes                 | No                   |          |          |          |
| Dyspnea                                   | Yes                         | Yes                         | No                    | No                   | No                  | No                   |          |          |          |
| Myalgia                                   | No                          | Yes                         | Yes                   | No                   | Yes                 | No                   |          |          |          |
| Diarrhea                                  | Yes                         | Yes                         | No                    | No                   | No                  | No                   |          |          |          |
| Anosmia / Ageusia                         | No                          | No                          | Yes                   | No                   | Yes                 | No                   |          |          |          |
| <b>Sampling</b>                           |                             |                             |                       |                      |                     |                      |          |          |          |
|                                           | Sample 1<br>(day 0)         | Sample 2<br>(day 10)        | Sample 1<br>(day 0)   | Sample 2<br>(day 10) | Sample 1<br>(day 0) | Sample 2<br>(day 10) | Sample 1 | Sample 1 | Sample 1 |
| Delay from 1st day at hospital (days)     | 14                          | 24                          | 10                    | 20                   | 0                   | 0                    | 0        | 0        | 0        |
| <b>Laboratory and chest CT findings</b>   |                             |                             |                       |                      |                     |                      |          |          |          |
| Leukocytes (G/L)                          | 10.2                        | 10.9                        | 11.4                  | 7.4                  | 4.9                 | 6.6                  | 5.7      | 6.7      | 7.1      |
| Neutrophils (G/L)                         | 6.9                         | 8.3                         | 7.7                   | 4.9                  | 2.2                 | 3.4                  | 3.4      | 4.0      | 4.2      |
| Lymphocytes (G/L)                         | 1.8                         |                             | 2.5                   |                      | 2.3                 |                      | 1.7      | 1.9      | 2.2      |
| Monocytes (G/L)                           | 0.7                         |                             | 0.68                  |                      | 0.27                |                      | 0.48     | 0.48     | 0.43     |
| Hemoglobin (g/dL)                         | 9.8                         | 10.5                        | 6.7                   | 6.8                  | 10.4                | 10.6                 | 12.6     | 12.4     | 12.8     |
| Platelets (G/L)                           | 186                         | 136                         | 282                   | 287                  | 281                 | 348                  | 302      | 236      | 230      |
| IL-6 (ng/L)                               | 11.1                        |                             | 67.3                  |                      | < 1.5               |                      | 3.5      | < 1.5    | < 1.5    |
| CRP (mg/L)                                | 16.7                        |                             | 193                   |                      | 1.1                 |                      | < 1.5    | < 1.0    | 4.4      |
| CT damage (%)                             | 50                          |                             | 25-50                 |                      |                     |                      |          |          |          |
| <b>Severity criteria</b>                  |                             |                             |                       |                      |                     |                      |          |          |          |
| PE                                        | No                          |                             | Yes                   |                      | No                  |                      | No       | No       | No       |
| Maximal O <sub>2</sub> (L/min)            | MV                          | 1                           | MV                    | MV                   | 0                   | 0                    | 0        | 0        | 0        |
| PaO <sub>2</sub> /FiO <sub>2</sub> (mmHg) | 124                         | 273                         | 225                   | 233                  |                     |                      |          |          |          |
| SOFA at sampling                          | 7                           | 6                           | 6                     | 3                    |                     |                      |          |          |          |
| Death, n (%)                              | No                          |                             | No                    |                      | No                  |                      | No       | No       | No       |

Samples were collected from four patients examined at Hôtel-Dieu COVID-19 screening unit for cough without or with fever. Only one of these patients was SARS-CoV2 RT-PCR-positive on nasopharyngeal swab. Given her mild symptoms, this 21-year old nurse was not hospitalized. She recovered at home and was seen 10 days later for a second blood screen.

Patient “Severe #1” is a 69-year old man with type 2 diabetes mellitus (body mass index, 26.2) who was hospitalized on April 4, 2020 because of fever, dyspnea, diarrhea and poor general condition. SARS-CoV2 RT-PCR on buccal swab was positive. He was rapidly transferred to Cochin hospital ICU and mechanically ventilated (MV), starting on April 5 (SOFA: 12, PaO<sub>2</sub>/FiO<sub>2</sub>: 182 at admission). The sample used for scRNAseq was collected on April 20, 2020 (SOFA: 7; PaO<sub>2</sub>/FiO<sub>2</sub>: 124). He progressively recovered, was released from mechanical ventilation on April 29 and transferred to a medical unit on April 30 (PaO<sub>2</sub>/FiO<sub>2</sub>: 273), when the sample used for the second scRNAseq analysis was collected. On May 5, the patient was recovering with mild oxygenotherapy (1L/min) in Cochin hospital pneumology care unit.

Patient “Severe #2” is a 26-year old woman with insulin-dependent type 1 diabetes mellitus and obesity (body mass index, 30.6) who was hospitalized on April 3, 2020 because of fever, dyspnea and diarrhea. On April 8, SARS-CoV2 RT-PCR on pharyngeal swab was positive. On April 10, she was hospitalized in Cochin hospital emergency unit with acido-cetosis after she had interrupted her daily insulin therapy. She required oxygenotherapy and was transferred to ICU on April 12 (SOFA score 3). The sample used for scRNAseq was collected on April 20, 2020 (SOFA: 6; PaO<sub>2</sub>/FiO<sub>2</sub>: 225). She developed a bacterial infection (*P. aeruginosa*, *S. aureus* in bronchoalveolar aspirate) on April 20, partially recovered and was transferred in Cochin hospital pneumology care unit on April 25, then returned to ICU on April 28 with degraded pulmonary condition due to *K. pneumonia* pneumonia pneumopathy and pulmonary embolism. The sample used for the second scRNAseq analysis was collected on April 30th (SOFA 3; PaO<sub>2</sub>/FiO<sub>2</sub>: 232.8). On May 4, she was still in ICU with progressive recovery of severity parameters (SOFA:1; PaO<sub>2</sub>/FiO<sub>2</sub>: 312).

**Table S4 related to Figures 2-4; Figures S2-S4:** Excel sheet providing the detailed results of scRNA seq experiments shown on Figure 2 to 4, including metadata, cell population numbers, cell population differentially expressed genes (DEGs), monocyte DEGs and neutrophils DEGs.

**Table S5 related to Figures 3,4; Figures S3,S5:** Characteristics of patients whose peripheral blood cells were analyzed by mass cytometry (left) or by RT-PCR (right).

|                                                       | <i>Cohort of patients whose cells were analyzed by mass cytometry<br/>(results shown on Figure 3-4 and supplemental Figure 3-4)</i> |                              |                                     |                            | <i>Cohort of patients whose buffy coat was analyzed by RT-qPCR.<br/>(results shown on supplemental Figure 5)</i> |                              |                                     |                            |
|-------------------------------------------------------|-------------------------------------------------------------------------------------------------------------------------------------|------------------------------|-------------------------------------|----------------------------|------------------------------------------------------------------------------------------------------------------|------------------------------|-------------------------------------|----------------------------|
|                                                       | All patients                                                                                                                        | SARS-CoV-2 negative Controls | SARS-CoV-2 positive Mild / Moderate | SARS-CoV-2 positive Severe | All patients                                                                                                     | SARS-CoV-2 negative Controls | SARS-CoV-2 positive Mild / Moderate | SARS-CoV-2 positive Severe |
| Number (%)                                            | 12 (100)                                                                                                                            | 4 (33)                       | 4 (33)                              | 4 (33)                     | 32                                                                                                               | 8 (25)                       | 16 (50)                             | 8 (25)                     |
| Age, median (IQR)                                     | 59 (47-62)                                                                                                                          | 58 (46-62)                   | 42 (27-58)                          | 65 (61-69)                 | 46 (31-61)                                                                                                       | 30 (26-44)                   | 49 (36-61)                          | 64 (47-69)                 |
| Age > 60 year-old, n (%)                              | 5 (42)                                                                                                                              | 2 (50)                       | 0 (0)                               | 3 (75)                     | 9 (28)                                                                                                           | 0 (0)                        | 5 (31)                              | 4 (50)                     |
| Male, n (%)                                           | 6 (50)                                                                                                                              | 2 (50)                       | 1 (25)                              | 3 (75)                     | 12 (38)                                                                                                          | 2 (25)                       | 5 (31)                              | 5 (50)                     |
| <b>Comorbidities, n (%)</b>                           |                                                                                                                                     |                              |                                     |                            |                                                                                                                  |                              |                                     |                            |
| Overweight                                            | 5 (42)                                                                                                                              | 1 (25)                       | 0 (0)                               | 4 (100)                    | 18 (56)                                                                                                          | 3 (38)                       | 8 (50)                              | 7 (88)                     |
| Cardiovascular                                        | 1 (8)                                                                                                                               | 0 (0)                        | 0 (0)                               | 1 (25)                     | 9 (28)                                                                                                           | 1 (18)                       | 5 (31)                              | 3 (38)                     |
| Diabetes                                              | 0 (0)                                                                                                                               | 0 (0)                        | 0 (0)                               | 0 (0)                      | 7 (22)                                                                                                           | 0 (0)                        | 3 (19)                              | 4 (50)                     |
| Respiratory                                           | 2 (17)                                                                                                                              | 1 (25)                       | 1 (25)                              | 0 (0)                      | 4 (13)                                                                                                           | 2 (25)                       | 1 (6)                               | 1 (13)                     |
| Cancer                                                | 0 (0)                                                                                                                               | 0 (0)                        | 0 (0)                               | 0 (0)                      | 0 (0)                                                                                                            | 0 (0)                        | 0 (0)                               | 0 (0)                      |
| <b>Initial symptoms, n (%)</b>                        |                                                                                                                                     |                              |                                     |                            |                                                                                                                  |                              |                                     |                            |
| Fever                                                 | 4 (33)                                                                                                                              | 0 (0)                        | 1 (25)                              | 3 (75)                     | 13 (41)                                                                                                          | 0 (0)                        | 6 (38)                              | 7 (88)                     |
| Cough                                                 | 9 (75)                                                                                                                              | 2 (50)                       | 4 (100)                             | 3 (75)                     | 21 (67)                                                                                                          | 4 (50)                       | 12 (75)                             | 5 (63)                     |
| Dyspnea                                               | 5 (42)                                                                                                                              | 0 (0)                        | 1 (25)                              | 4 (100)                    | 13 (41)                                                                                                          | 1 (13)                       | 4 (25)                              | 8 (100)                    |
| Myalgia                                               | 4 (33)                                                                                                                              | 2 (50)                       | 2 (50)                              | 0 (0)                      | 11 (34)                                                                                                          | 3 (38)                       | 4 (25)                              | 4 (50)                     |
| Diarrhea                                              | 5 (42)                                                                                                                              | 2 (50)                       | 3 (75)                              | 0 (0)                      | 12 (38)                                                                                                          | 4 (50)                       | 6 (38)                              | 2 (25)                     |
| Anosmia / Ageusia                                     | 3 (25)                                                                                                                              | 2 (50)                       | 1 (25)                              | 0 (0)                      | 9 (28)                                                                                                           | 0 (0)                        | 7 (44)                              | 2 (25)                     |
| <b>Laboratory findings, median (IQR)</b>              |                                                                                                                                     |                              |                                     |                            |                                                                                                                  |                              |                                     |                            |
| Leukocytes (G/L)                                      | 6.9 (5.7-9.7)                                                                                                                       | 6.7 (5.9-8.0)                | 6.4 (4.0-8.9)                       | 8.9 (6.4-12.1)             | 6.6 (1.9-23.4)                                                                                                   | 7.4 (6.2-9.8)                | 5.8 (4.0-6.3)                       | 10.7 (9.4-12.7)            |
| Neutrophils (G/L)                                     | 4.8 (3.2-6.0)                                                                                                                       | 4.0 (3.0-6.6)                | 3.7 (2.5-5.3)                       | 6.9 (5.3-8.8)              | 4.6 (3.4-7.5)                                                                                                    | 4.3 (3.6-5.1)                | 3.4 (1.5-4.6)                       | 7.6 (7.2-10.1)             |
| Lymphocytes (G/L)                                     | 1.6 (1.0-2.1)                                                                                                                       | 1.8 (1.7-2.0)                | 1.7 (0.9-2.5)                       | 1.2 (0.7-1.7)              | 1.6 (0.5-3.9)                                                                                                    | 2.8 (2.0-3.1)                | 1.0 (0.8-1.3)                       | 1.5 (1.3-1.7)              |
| Monocytes (G/L)                                       | 0.5 (0.5-0.7)                                                                                                                       | 0.5 (0.4-0.7)                | 0.5 (0.5-0.6)                       | 0.7 (0.5-1.0)              | 0.5 (0.1-1.7)                                                                                                    | 0.5 (0.4-0.6)                | 0.3 (0.2-0.5)                       | 0.6 (0.5-0.9)              |
| Hemoglobin (g/dL)                                     | 12.6 (11.4-14.8)                                                                                                                    | 14.2 (12.7-15.5)             | 13.8 (11.8-16.3)                    | 10.4 (9.3-11.2)            | 12.6 (10.8-13.5)                                                                                                 | 13.0 (13.6-14.4)             | 12.6 (11.6-13.3)                    | 8.5 (7.3-9.8)              |
| Platelets (G/L)                                       | 202 (177-271)                                                                                                                       | 217 (190-267)                | 186 (170-197)                       | 323 (210-442)              | 261 (86-526)                                                                                                     | 285 (252-324)                | 232 (173-394)                       | 224 (131-300)              |
| Fibrinogen (g/L)                                      | 3.2 (2.8-5.4)                                                                                                                       | 3.0 (2.6-3.7)                | 3.0 (2.7-3.5)                       | 7.2 (6.2-7.6)              |                                                                                                                  |                              | 4.4 (3.1-6.2)                       | 7.5 (6.7-9.9)              |
| D-dimers (ng/mL)                                      | 329 (239-1587)                                                                                                                      | 313 (210-410)                | 244 (219-254)                       | 91.2 (48.8-176.6)          |                                                                                                                  |                              | 726 (227-1326)                      | 3721 (2134-5544)           |
| IL-6 (ng/L)                                           | 2.9 (1.4-37.0)                                                                                                                      | 1.4 (1.4-8.5)                | 2.1 (1.4-8.7)                       | 113.2 (58.4-186.1)         | 1.4 (1.4-51.8)                                                                                                   | 1.4 (1.4-1.4)                | 1.4 (1.4-36.7)                      | 109.6 (74.5-127.5)         |
| CRP (mg/L)                                            |                                                                                                                                     |                              |                                     | 177 (146-306)              |                                                                                                                  |                              | 10.0 (0.9-104.0)                    | 169 (128-232)              |
| Ferritin (µg/L)                                       |                                                                                                                                     |                              |                                     | 1888 (1423-2343)           |                                                                                                                  |                              | 643 (504-856)                       | 1252 (1175-1455)           |
| LDH (U/L)                                             |                                                                                                                                     |                              |                                     | 405 (355-412)              |                                                                                                                  |                              | 240 (240-293)                       | 462 (370-681)              |
| <b>Chest CT findings, n (%)</b>                       |                                                                                                                                     |                              |                                     |                            |                                                                                                                  |                              |                                     |                            |
| NA                                                    | 8 (67)                                                                                                                              | 4 (100)                      | 4 (100)                             | 0 (0)                      | 18 (56)                                                                                                          | 8 (100)                      | 8 (50)                              | 2 (25)                     |
| <10%                                                  | 0 (0)                                                                                                                               |                              |                                     | 0 (0)                      | 1 (3)                                                                                                            |                              | 1 (6)                               | 0 (0)                      |
| 10-25%                                                | 0 (0)                                                                                                                               |                              |                                     | 0 (0)                      | 2 (6)                                                                                                            |                              | 0 (0)                               | 2 (25)                     |
| 25-50%                                                | 4 (33)                                                                                                                              |                              |                                     | 4 (100)                    | 6 (17)                                                                                                           |                              | 5 (31)                              | 1 (13)                     |
| >50%                                                  | 0 (0)                                                                                                                               |                              |                                     | 0 (0)                      | 5 (14)                                                                                                           |                              | 2 (13)                              | 3 (38)                     |
| <b>Anti-inflammatory drugs, n</b>                     |                                                                                                                                     |                              |                                     |                            |                                                                                                                  |                              |                                     |                            |
| Dexamethasone                                         | 0                                                                                                                                   | 0                            | 0                                   | 0                          | 2                                                                                                                | 0                            | 1                                   | 1                          |
| anti-IL-1 (anakinra)                                  | 0                                                                                                                                   | 0                            | 0                                   | 0                          | 2                                                                                                                | 0                            | 0                                   | 2                          |
| anti-IL-6 (sari, toci)                                | 0                                                                                                                                   | 0                            | 0                                   | 0                          | 2                                                                                                                | 0                            | 1                                   | 1                          |
| <b>Severity criteria</b>                              |                                                                                                                                     |                              |                                     |                            |                                                                                                                  |                              |                                     |                            |
| PE, n (%)                                             | 2 (17)                                                                                                                              | 0 (0)                        | 0 (0)                               | 2 (50)                     | 3 (9)                                                                                                            | 0 (0)                        | 1 (6)                               | 2 (25)                     |
| Maximal O <sub>2</sub> (L/min), median (range)        |                                                                                                                                     |                              |                                     | MV (n = 4)                 |                                                                                                                  |                              | 7 (1-10)*                           | MV (n = 8)                 |
| PaO <sub>2</sub> /FiO <sub>2</sub> , median (range)** |                                                                                                                                     |                              |                                     | 157 (95-232)               |                                                                                                                  |                              |                                     | 146 (99-249)               |
| SOFA, median (range)**                                |                                                                                                                                     |                              |                                     | 3 (2-8)                    |                                                                                                                  |                              |                                     | 9 (4-12)                   |
| SOFA ≥ 8, n (%)**                                     |                                                                                                                                     |                              |                                     | 1 (25)                     |                                                                                                                  |                              |                                     | 5 (63)                     |
| Death, n (%)                                          | 1 (8)                                                                                                                               | 0 (0)                        | 0 (0)                               | 1 (25)                     | 0 (0)                                                                                                            | 0 (0)                        | 0 (0)                               | 0 (0)                      |
| <b>Sampling, n (%)</b>                                |                                                                                                                                     |                              |                                     |                            |                                                                                                                  |                              |                                     |                            |
| Delay since 1 <sup>st</sup> day hospital ≤ 10 days    | 12 (100)                                                                                                                            | 4 (100)                      | 4 (100)                             | 4 (100)                    | 30 (94)                                                                                                          | 8 (100)                      | 15 (94)                             | 7 (88)                     |

IQR, interquartile range; LDH, Lactate dehydrogenase; CT, computed tomography; NA: not available; Sari, sarilumab ; toci, tocilizumab; PE, pulmonary embolism; MV, mechanical ventilation; \*Maximal O<sub>2</sub> calculated for 8 pts with moderate disease; PaO<sub>2</sub>/FiO<sub>2</sub> (mmHg) at sampling; \*\*Parameters calculated for patients under MV; SOFA, Sequential Organ Failure Assessment score; “Delay since the 1<sup>st</sup> day in hospital ≤ 10 days” indicates the number of patients included in the study within the first 10 days after admission to the hospital.

**Table S6 related to Figures 5-7; Figures S5-S7:** Characteristics of patients of the validation cohorts, with circulating protein measurements and spectral flow cytometry analyses.

|                                                        | Cohort of patients with circulating protein level measurements<br>(results shown on Figure 5 and supplemental Figure 5) |                              |                                     |                            | Cohort of patients analyzed by spectral flow cytometry (CYTEK)<br>(results shown on Figure 6-7 and supplemental Figure 6) |                              |                                     |                            |
|--------------------------------------------------------|-------------------------------------------------------------------------------------------------------------------------|------------------------------|-------------------------------------|----------------------------|---------------------------------------------------------------------------------------------------------------------------|------------------------------|-------------------------------------|----------------------------|
|                                                        | All patients                                                                                                            | SARS-CoV-2 negative Controls | SARS-CoV-2 positive Mild / Moderate | SARS-CoV-2 positive Severe | All patients                                                                                                              | SARS-CoV-2 negative Controls | SARS-CoV-2 positive Mild / Moderate | SARS-CoV-2 positive Severe |
| Number (%)                                             | 84 (100)                                                                                                                | 40 (48)                      | 19 (23)                             | 25 (30)                    | 90                                                                                                                        | 48 (53)                      | 16 (18)                             | 26 (29)                    |
| Age, median (IQR)                                      | 53 (40-62)                                                                                                              | 52 (36-58)                   | 49 (28-58)                          | 66 (59-73)                 | 49 (31-59)                                                                                                                | 42 (30-52)                   | 45 (28-58)                          | 62 (47-72)                 |
| Age > 60 year-old, n (%)                               | 25 (30)                                                                                                                 | 6 (15)                       | 3 (16)                              | 16 (64)                    | 20 (22)                                                                                                                   | 3 (12)                       | 3 (19)                              | 14 (54)                    |
| Male, n (%)                                            | 35 (42)                                                                                                                 | 14 (35)                      | 3 (16)                              | 18 (72)                    | 37 (41)                                                                                                                   | 15 (31)                      | 4 (25)                              | 18 (69)                    |
| <b>Comorbidities, n (%)</b>                            |                                                                                                                         |                              |                                     |                            |                                                                                                                           |                              |                                     |                            |
| Overweight                                             | 45 (54)                                                                                                                 | 18 (45)                      | 6 (32)                              | 21 (84)                    | 48 (53)                                                                                                                   | 20 (42)                      | 4 (25)                              | 24 (92)                    |
| Cardiovascular                                         | 29 (35)                                                                                                                 | 13 (22)                      | 4 (21)                              | 12 (48)                    | 25 (28)                                                                                                                   | 11 (23)                      | 4 (25)                              | 10 (38)                    |
| Diabetes                                               | 16 (19)                                                                                                                 | 3 (8)                        | 3 (16)                              | 10 (40)                    | 11 (12)                                                                                                                   | 1 (2)                        | 3 (19)                              | 7 (27)                     |
| Respiratory                                            | 15 (18)                                                                                                                 | 9 (23)                       | 1 (5)                               | 5 (20)                     | 17 (19)                                                                                                                   | 9 (19)                       | 1 (8)                               | 7 (27)                     |
| Cancer                                                 | 4 (5)                                                                                                                   | 2 (5)                        | 1 (5)                               | 1 (4)                      | 6 (7)                                                                                                                     | 2 (4)                        | 2 (13)                              | 2 (8)                      |
| <b>Initial symptoms, n (%)</b>                         |                                                                                                                         |                              |                                     |                            |                                                                                                                           |                              |                                     |                            |
| Fever                                                  | 30 (36)                                                                                                                 | 7 (18)                       | 4 (21)                              | 19 (76)                    | 27 (30)                                                                                                                   | 6 (12)                       | 4 (25)                              | 23 (88)                    |
| Cough                                                  | 46 (55)                                                                                                                 | 17 (43)                      | 12 (63)                             | 17 (65)                    | 49 (54)                                                                                                                   | 24 (50)                      | 10 (63)                             | 18 (69)                    |
| Dyspnea                                                | 24 (29)                                                                                                                 | 0 (0)                        | 3 (16)                              | 21 (84)                    | 21 (23)                                                                                                                   | 1 (2)                        | 3 (19)                              | 23 (88)                    |
| Myalgia                                                | 31 (37)                                                                                                                 | 18 (45)                      | 6 (32)                              | 7 (28)                     | 32 (36)                                                                                                                   | 20 (42)                      | 6 (38)                              | 10 (38)                    |
| Diarrhea                                               | 20 (24)                                                                                                                 | 6 (15)                       | 7 (37)                              | 7 (28)                     | 21 (23)                                                                                                                   | 12 (25)                      | 6 (38)                              | 6 (23)                     |
| Anosmia / Ageusia                                      | 18 (45)                                                                                                                 | 8 (20)                       | 5 (26)                              | 5 (20)                     | 15 (17)                                                                                                                   | 8 (17)                       | 3 (19)                              | 5 (19)                     |
| <b>Laboratory findings, median (IQR)</b>               |                                                                                                                         |                              |                                     |                            |                                                                                                                           |                              |                                     |                            |
| Leucocytes (G/L)                                       | 7.1 (5.6-10.3)                                                                                                          | 6.7 (5.6-8.5)                | 5.6 (4.3-6.8)                       | 5.7 (4.7-8.9)              | 7.6 (5.6-9.9)                                                                                                             | 6.5 (5.6-8.1)                | 5.1 (4.0-6.2)                       | 11.1 (8.8-14.5)            |
| Neutrophils (G/L)                                      | 4.4 (3.0-7.4)                                                                                                           | 3.7 (2.9-5.2)                | 2.8 (2.3-3.5)                       | 4.6 (3.4-6.1)              | 4.4 (2.9-7.0)                                                                                                             | 3.4 (2.9-4.8)                | 3.5 (2.9-4.9)                       | 8.4 (6.4-12.1)             |
| Lymphocytes (G/L)                                      | 1.6 (1.0-2.1)                                                                                                           | 1.9 (1.5-2.3)                | 1.6 (1.0-2.1)                       | 1.0 (0.7-1.3)              | 1.8 (1.3-2.3)                                                                                                             | 2.0 (1.7-2.5)                | 1.5 (1.0-2.1)                       | 1.5 (0.8-1.9)              |
| Monocytes (G/L)                                        | 0.5 (0.4-0.8)                                                                                                           | 0.5 (0.4-0.6)                | 0.5 (0.4-0.7)                       | 0.4 (0.2-0.7)              | 0.5 (0.4-0.7)                                                                                                             | 0.5 (0.4-0.6)                | 0.5 (0.4-0.6)                       | 0.7 (0.5-0.9)              |
| Hemoglobin (g/dL)                                      | 12.6 (9.9-13.9)                                                                                                         | 13.7 (12.8-14.7)             | 13.0 (11.3-13.6)                    | 10.5 (9.6-13.0)            | 13.1 (11.2-14.3)                                                                                                          | 14.0 (13.2-14.8)             | 13.0 (11.3-13.9)                    | 9.8 (8.3-11.3)             |
| Platelets (G/L)                                        | 255 (205-320)                                                                                                           | 257 (227-303)                | 210 (171-296)                       | 191 (123-323)              | 256 (210-320)                                                                                                             | 254 (225-303)                | 186 (132-293)                       | 292 (233-394)              |
| Fibrinogen (g/L)                                       | 3.8 (2.9-5.9)                                                                                                           | 2.9 (2.5-3.1)                | 3.5 (2.9-4.9)                       | 6.7 (5.4-8.2)              | 4.1 (2.9-7.0)                                                                                                             | 2.9 (2.5-3.1)                | 3.5 (2.9-4.9)                       | 7.7 (5.8-9.1)              |
| D-dimers (ng/mL)                                       | 483 (194-1581)                                                                                                          | 204 (144-292)                | 384 (217-1081)                      | 2270 (1285-5944)           | 435 (209-2135)                                                                                                            | 200 (144-274)                | 476 (254-1085)                      | 2330 (1632-5790)           |
| IL-6 (ng/L)                                            | 3.1 (1.4-45.8)                                                                                                          | 1.4 (1.4-3.6)                | 2.3 (1.4-5.8)                       | 91.2 (48.8-176.6)          | 2.3 (1.4-2762.0)                                                                                                          | 1.4 (1.4-2.6)                | 1.4 (2.3-8.0)                       | 83.7 (54.5-172.8)          |
| CRP (mg/L)                                             |                                                                                                                         |                              |                                     | 50.5 (30.6-98.0)           |                                                                                                                           |                              |                                     | 165.5 (104.0-245.0)        |
| Ferritin (µg/L)                                        |                                                                                                                         |                              |                                     | 781 (416-1472)             |                                                                                                                           |                              |                                     | 994 (627-1633)             |
| LDH (U/L)                                              |                                                                                                                         |                              |                                     | 418 (350-464)              |                                                                                                                           |                              |                                     | 424 (339-452)              |
| <b>Chest CT findings, n (%)</b>                        |                                                                                                                         |                              |                                     |                            |                                                                                                                           |                              |                                     |                            |
| NA                                                     | 54 (64)                                                                                                                 | 40 (100)                     | 12 (63)                             | 2 (8)                      | 63 (70)                                                                                                                   | 48 (100)                     | 12 (100)                            | 3 (12)                     |
| <10%                                                   | 0 (0)                                                                                                                   |                              | 0 (0)                               | 0 (0)                      | 0 (0)                                                                                                                     |                              | 0 (0)                               | 0 (0)                      |
| 10-25%                                                 | 6 (7)                                                                                                                   |                              | 1 (5)                               | 4 (16)                     | 5 (6)                                                                                                                     |                              | 2 (13)                              | 3 (12)                     |
| 25-50%                                                 | 7 (8)                                                                                                                   |                              | 3 (16)                              | 4 (16)                     | 14 (16)                                                                                                                   |                              | 2 (13)                              | 12 (46)                    |
| >50%                                                   | 18 (21)                                                                                                                 |                              | 3 (16)                              | 15 (60)                    | 8 (9)                                                                                                                     |                              | 0 (0)                               | 8 (31)                     |
| <b>Anti-inflammatory drugs, n</b>                      |                                                                                                                         |                              |                                     |                            |                                                                                                                           |                              |                                     |                            |
| Dexamethasone                                          | 2                                                                                                                       | 0                            | 0                                   | 2                          | 1                                                                                                                         | 0                            | 0                                   | 1                          |
| anti-IL-1 (anakinra)                                   | 1                                                                                                                       | 0                            | 0                                   | 1                          | 2                                                                                                                         | 0                            | 0                                   | 2                          |
| anti-IL-6 (sari, toci)                                 | 2                                                                                                                       | 0                            | 1                                   | 1                          | 13                                                                                                                        | 0                            | 1                                   | 2                          |
| <b>Severity criteria</b>                               |                                                                                                                         |                              |                                     |                            |                                                                                                                           |                              |                                     |                            |
| PE, n (%)                                              | 9 (11)                                                                                                                  | 0 (0)                        | 2 (11)                              | 7 (28)                     | 8 (9)                                                                                                                     | 0 (0)                        | 2 (13)                              | 6 (23)                     |
| Maximal O <sub>2</sub> (L/min)                         |                                                                                                                         |                              | 2 (1-9)*                            | 15 (9-50) or MV (n=20)     |                                                                                                                           |                              | 2 (2-4)**                           | 12 (n=1) or MV (n=25)      |
| PaO <sub>2</sub> /FiO <sub>2</sub> , median (range)*** |                                                                                                                         |                              |                                     | 164 (75-404)               |                                                                                                                           |                              |                                     | 159 (75-404)               |
| SOFA, median (range)***                                |                                                                                                                         |                              |                                     | 7 (2-14)                   |                                                                                                                           |                              |                                     | 4 (2-14)                   |
| SOFA ≥ 8, n (%)***                                     |                                                                                                                         |                              |                                     | 10 (50)                    |                                                                                                                           |                              |                                     | 5 (19)                     |
| Death, n (%)                                           |                                                                                                                         |                              |                                     | 6 (24)                     |                                                                                                                           |                              |                                     | 7 (27)                     |
| <b>Sampling, n (%)</b>                                 |                                                                                                                         |                              |                                     |                            |                                                                                                                           |                              |                                     |                            |
| Delay since 1 <sup>st</sup> day hospital ≤ 10 days     | 78 (93)                                                                                                                 | 40 (100)                     | 19 (100)                            | 19 (76)                    | 86 (95)                                                                                                                   | 48 (100)                     | 16 (100)                            | 21 (81)                    |

IQR: interquartile range; LDH, lactate dehydrogenase; CT: computed tomography; NA, not available; Sari, sarilumab; toci, tocilizumab; PE, pulmonary embolism; \*Maximal O<sub>2</sub> for 6 patients with moderate disease; \*\*Maximal O<sub>2</sub> for 3 patients with moderate disease; MV, mechanical ventilation; PaO<sub>2</sub>/FiO<sub>2</sub> (mmHg) at sampling; SOFA: Sequential Organ Failure Assessment score; \*\*\*Parameters calculated for patients under MV. “Delay since the 1<sup>st</sup> day in hospital ≤ 10 days” indicates the number of patients included in the study within the first 10 days after admission to the hospital.

**Table S7 related to Figure 7; Figure S7:** Characteristics of patients tested by conventional flow cytometry for non-classical monocyte fraction measurement (results shown on Figure 7 and supplemental Figure 7).

|                                                     | <i>Learning cohort</i> |                              |                          |                              |                            | <i>Validation cohort</i> |                              |                          |                              |                            |
|-----------------------------------------------------|------------------------|------------------------------|--------------------------|------------------------------|----------------------------|--------------------------|------------------------------|--------------------------|------------------------------|----------------------------|
|                                                     | All patients           | SARS-CoV-2 negative Controls | SARS-CoV-2 positive Mild | SARS-CoV-2 positive Moderate | SARS-CoV-2 positive Severe | All patients             | SARS-CoV-2 negative Controls | SARS-CoV-2 positive Mild | SARS-CoV-2 positive Moderate | SARS-CoV-2 positive Severe |
| Number (%)                                          | 98                     | 56 (57)                      | 16 (16)                  | 10 (10)                      | 16 (16)                    | 24                       | 10 (42)                      | 3 (13)                   | 4 (17)                       | 7 (29)                     |
| Age, median (IQR)                                   | 50 (20-89)             | 46 (31-54)                   | 37 (26-58)               | 57 (46-74)                   | 68 (49-75)                 | 60 (54 - 68)             | 63 (57 - 68)                 | 56 (52 - 68)             | 69 (65 - 74)                 | 46 (43 - 58)               |
| Age > 60 y, n (%)                                   | 23 (23)                | 6 (11)                       | 2 (13)                   | 5 (50)                       | 10 (62)                    | 12 (50)                  | 7 (70)                       | 1 (33)                   | 4 (100)                      | 0 (0)                      |
| Male, n (%)                                         | 39 (40)                | 19 (34)                      | 5 (31)                   | 3 (30)                       | 12 (75)                    | 12 (50)                  | 6 (60)                       | 1 (33)                   | 1 (25)                       | 4 (57)                     |
| <b>Comorbidities, n (%)</b>                         |                        |                              |                          |                              |                            |                          |                              |                          |                              |                            |
| Overweight                                          | 45 (46)                | 24 (43)                      | 4 (25)                   | 5 (50)                       | 12 (75)                    | 7 (29)                   | 3 (30)                       | 1 (33)                   | 1 (25)                       | 2 (29)                     |
| Cardiovascular                                      | 33 (34)                | 15 (27)                      | 2 (13)                   | 6 (60)                       | 9 (56)                     | 10 (42)                  | 4 (40)                       | 2 (67)                   | 3 (75)                       | 1 (14)                     |
| Diabetes                                            | 16 (16)                | 4 (7)                        | 1 (6)                    | 4 (40)                       | 7 (44)                     | 8 (33)                   | 5 (50)                       | 0 (0)                    | 2 (50)                       | 1 (14)                     |
| Respiratory                                         | 19 (19)                | 12 (21)                      | 2 (13)                   | 2 (20)                       | 3 (19)                     | 8 (33)                   | 5 (50)                       | 0 (0)                    | 1 (25)                       | 3 (43)                     |
| Cancer                                              | 10 (10)                | 3 (5)                        | 2 (13)                   | 3 (30)                       | 2 (12)                     | 21 (87)                  | 10 (100)                     | 3 (100)                  | 4 (100)                      | 4 (57)                     |
| <b>Initial symptoms, n (%)</b>                      |                        |                              |                          |                              |                            |                          |                              |                          |                              |                            |
| Fever                                               | 50 (51)                | 25 (45)                      | 10 (63)                  | 5 (50)                       | 10 (62)                    | 9 (37)                   | 1 (10)                       | 1 (33)                   | 1 (25)                       | 6 (86)                     |
| Cough                                               | 19 (19)                | 1 (2)                        | 0 (0)                    | 5 (50)                       | 13 (81)                    | 10 (42)                  | 2 (20)                       | 1 (33)                   | 3 (75)                       | 4 (57)                     |
| Dyspnea                                             | 38 (39)                | 23 (41)                      | 8 (50)                   | 1 (10)                       | 6 (38)                     | 1 (4)                    | 0 (0)                        | 0 (0)                    | 1 (25)                       | 0 (0)                      |
| Myalgia                                             | 24 (24)                | 12 (21)                      | 5 (31)                   | 4 (40)                       | 3 (19)                     | 0 (0)                    | 0 (0)                        | 0 (0)                    | 0 (0)                        | 0 (0)                      |
| Diarrhea                                            | 23 (23)                | 11 (20)                      | 7 (44)                   | 1 (10)                       | 4 (25)                     | 1 (4)                    | 0 (0)                        | 0 (0)                    | 0 (0)                        | 1 (14)                     |
| Anosmia / Ageusia                                   | 25 (26)                | 8 (14)                       | 1 (6)                    | 5 (50)                       | 11 (69)                    | 12 (50)                  | 2 (20)                       | 1 (33)                   | 4 (100)                      | 5 (71)                     |
| <b>Laboratory findings, median (IQR)</b>            |                        |                              |                          |                              |                            |                          |                              |                          |                              |                            |
| Leucocytes (G/L)                                    | 6.4 (1.9-22.9)         | 6.5 (5.6-8.2)                | 4.9 (4.3-6.0)            | 5.0 (3.6-6.9)                | 10.5 (9.0-16.4)            | 10.5 (6.8 - 12.1)        | 8.8 (5.6 - 12.1)             | 11.2 (7.9 - 13.0)        | 10.4 (6.2 - 11.9)            | 10.6 (6.8 - 15.2)          |
| Neutrophils (G/L)                                   | 3.5 (1.1-19.1)         | 3.4 (2.8-4.6)                | 2.8 (2.4-3.3)            | 3.4 (2.8-5.5)                | 7.7 (6.5-12.4)             | 7.2 (3.9 - 9.1)          | 7.2 (3.7 - 9.6)              | 8.5 (3.4 - 9.0)          | 7.1 (3.9 - 8.6)              | 7.9 (4.0 - 12.5)           |
| Lymphocytes (G/L)                                   | 1.8 (0.2-3.9)          | 2.0 (1.7-2.4)                | 1.7 (1.3-2.2)            | 1.0 (0.5-1.3)                | 0.9 (0.6-1.6)              | 1.0 (0.8 - 1.7)          | 1.0 (0.6 - 1.5)              | 1.6 (0.3 - 3.5)          | 1.7 (0.6 - 2.6)              | 1.4 (0.8 - 2.3)            |
| Monocytes (G/L)                                     | 0.5 (0.0-9.3)          | 0.5 (0.4-0.6)                | 0.5 (0.4-0.7)            | 0.2 (0.2-0.6)                | 0.8 (0.4-1.1)              | 0.9 (0.6 - 1.2)          | 0.8 (0.4 - 1.1)              | 1.0 (0.6 - 1.7)          | 1.1 (0.7 - 1.1)              | 1.2 (0.5 - 1.3)            |
| Hemoglobin (g/dL)                                   | 13.2 (11.6-14.1)       | 13.7 (13.1-14.7)             | 13.1 (11.4-13.7)         | 11.5 (9.8-13.3)              | 9.8 (8.1-12.0)             | 10.1 (8.9 - 12.8)        | 12.6 (9.7 - 15.2)            | 9.1 (8.9 - 11.9)         | 9.4 (8.6 - 10.1)             | 8.7 (8.2 - 11.1)           |
| Platelets (G/L)                                     | 247 (43.0-737.0)       | 255 (225-302)                | 231 (159-317)            | 140 (106-233)                | 246 (203-339)              | 298 (200 - 494)          | 272 (212 - 433)              | 456 (155 - 507)          | 445 (186 - 613)              | 264 (153 - 444)            |
| Fibrinogen (g/L)                                    |                        |                              |                          | 5.1 (3.9-7.2)                | 6.9 (5.6-9.2)              |                          |                              |                          | 5.5 (4.9 - 7.2)              | 8.0 (4.9 - 8.5)            |
| D-dimers (ng/mL)                                    |                        |                              |                          | 1052 (409-2292)              | 3172 (1209-5301)           |                          |                              |                          | 1630 (860 - 7360)            | 2490 (605 - 5073)          |
| CRP (mg/L)                                          |                        |                              |                          | 44.2 (30.6-79.7)             | 123.0 (86.0-179.0)         |                          |                              |                          | 37.0 (5.1 - 266.5)           | 155.1 (52.9 - 248.9)       |
| IL-6 (ng/L)                                         |                        |                              |                          | 20.2 (5.4-74.5)              | 73.3 (55.9-111.1)          |                          |                              |                          |                              |                            |
| Ferritin (µg/L)                                     |                        |                              |                          | 724 (412-1371)               | 972 (694-1419)             |                          |                              |                          | 1376 (327-5100)              | 1730 (1144-3060)           |
| LDH (U/L)                                           |                        |                              |                          | 254 (204-382)                | 435 (341-455)              |                          |                              |                          | 256 (200-318)                | 338 (312-1022)             |
| <b>Chest CT findings, n (%)</b>                     |                        |                              |                          |                              |                            |                          |                              |                          |                              |                            |
| NA                                                  | 71 (72)                | 54 (96)                      | 14 (88)                  | 1 (10)                       | 2 (12)                     | 7 (29)                   | 7 (70)                       | 0 (0)                    | 0 (0)                        | 0 (0)                      |
| <10%                                                | 4 (4)                  | 1 (2)                        | 2 (13)                   | 1 (10)                       | 0 (0)                      | 3 (13)                   | 1 (10)                       | 1 (33)                   | 1 (25)                       | 0 (0)                      |
| 10-25%                                              | 9 (9)                  | 1 (2)                        | 0 (0)                    | 5 (50)                       | 3 (19)                     | 2 (8)                    | 1 (10)                       | 0 (0)                    | 2 (50)                       | 0 (0)                      |
| 25-50%                                              | 5 (5)                  | 0 (0)                        | 0 (0)                    | 2 (20)                       | 3 (19)                     | 7 (29)                   | 0 (0)                        | 2 (67)                   | 1 (25)                       | 5 (71)                     |
| >50%                                                | 8 (8)                  | 0 (0)                        | 0 (0)                    | 0 (0)                        | 8 (50)                     | 3 (13)                   | 1 (10)                       | 0 (0)                    | 0 (0)                        | 2 (29)                     |
| <b>Anti-inflammatory drugs, n</b>                   |                        |                              |                          |                              |                            |                          |                              |                          |                              |                            |
| Dexamethasone                                       | 6                      | 0                            | 0                        | 2                            | 4                          | 0                        | 0                            | 0                        | 0                            | 0                          |
| anti-IL-1 (anakinra)                                | 4                      | 0                            | 0                        | 1                            | 3                          | 0                        | 0                            | 0                        | 0                            | 0                          |
| anti-IL-6 (sari, toci)                              | 3                      | 0                            | 0                        | 2                            | 1                          | 3                        | 0                            | 0                        | 0                            | 3                          |
| <b>Severity criteria</b>                            |                        |                              |                          |                              |                            |                          |                              |                          |                              |                            |
| PE, n (%)                                           | 7 (7)                  | 1 (2)                        | 0 (0)                    | 2 (20)                       | 4 (25)                     | 1 (4)                    | 0 (0)                        | 0 (0)                    | 1 (25)                       | 0 (0)                      |
| PaO <sub>2</sub> /FiO <sub>2</sub> , median (range) |                        |                              |                          |                              | 140 (75-226)*              |                          |                              |                          |                              | 169 (112-453)**            |
| SOFA, median (range)                                |                        |                              |                          |                              | 11 (2-14)*                 |                          |                              |                          |                              | 3 (0 - 6)**                |
| Death, n (%)                                        | 4 (4)                  | 0 (0)                        | 0 (0)                    | 0 (0)                        | 4 (25)                     | 1 (4)                    | 0 (0)                        | 0 (0)                    | 0 (0)                        | 1 (14)                     |
| <b>Sampling, n (%)</b>                              |                        |                              |                          |                              |                            |                          |                              |                          |                              |                            |
| Delay since 1 <sup>st</sup> day hospital ≤ 10 days  | 96 (98)                | 55 (98)                      | 16 (100)                 | 11 (100)                     | 15 (94)                    | 24 (100)                 | 10 (100)                     | 3 (100)                  | 4 (100)                      | 7 (100)                    |

y, year-old; LDH, lactate deshydrogenase; IQR, interquartile range; CT, computed tomography; NA, not available; Sari, sarilumab ; toci, tocilizumab; PE, pulmonary embolism; PaO<sub>2</sub>/FiO<sub>2</sub> (mmHg) at sampling; SOFA, Sequential Organ Failure Assessment score; \*Parameters calculated for 13 patients under mechanical ventilation; \*\*Parameters calculated for 3 patients under mechanical ventilation; “Delay since the 1<sup>st</sup> day in hospital ≤ 10 days” indicates the number of patients included in the study within the first 10 days after admission to the hospital.
